# Supplementary material for: LabPipe: an extensible bioinformatics toolkit to manage experimental data and metadata
Source: PubMed Central journal article supplement (PMC7709404; doi:10.1186/s12859-020-03908-5), 2020-12-02
Supplement: 12859_2020_3908_MOESM1_ESM.pdf [file 12859_2020_3908_MOESM1_ESM.pdf]

# LabPipe step-by-step setup guide

Supplementary information for setting up a basic LabPipe Server/Client.

---

## Install server prerequisites

LabPipe Server requires:

- MongoDB  
*Tested with MongoDB 4.4.1 Community Edition and MongoDB Atlas 4.2.10 Enterprise*
  - Java  
*Tested with OpenJDK 1.8.0.212 and OpenJDK 11.0.2*
1. Follow the [guide](#) to install MongoDB
  2. Follow the [guide](#) to install OpenJDK 8 or OpenJDK 11
- 

## Download LabPipe Server

Download the [latest release](#) (JAR file) at <https://github.com/rcfgroup/labpipe-server-public/releases/latest>.

---

## Download LabPipe Client

Download the [latest release](#) at <https://github.com/rcfgroup/labpipe-client-public/releases/latest> based on your operating system:

- Windows
    - labpipe-client.Setup.[version].exe  
Click and run.
  - Mac
    - labpipe-client-[version]-mac.zip  
Uncompress and move **labpipe-client.app** to **Applications**, then click and run. It may ask for permission to run and to access your disk.
  - Linux
    - labpipe-client-[version].AppImage  
Make the downloaded file executable using `chmod a+x`, then use `./labpipe-client-[version].AppImage` to run.
- 

## Configure LabPipe Server

```
java -jar labpipe-server-v{x.x.x}.jar check
```

If you are using LabPipe Server for the first time, this will use built-in default configs to check whether LabPipe Server can work. A config file `config.toml` will also be generated. Here is an example of the file:

```
config.toml

1  [labpipe]
2  port = 4567          # The port LabPipe Server will be running on
3
4  [labpipe.database]
5  host = "localhost"  # MongoDB host
6  port = 27017        # MongoDB port, can leave as default if using srv mode
7  name = "labpipe"    # MongoDB database name
8  user = ""           # MongoDB username
9  password = ""       # MongoDB password
10 useSrv = false      # Use srv mode to connect
11
12 [labpipe.email]
13 host = "localhost"  # Email server host
14 port = 25           # Email server port
15 user = ""           # Email server username
16 password = ""       # Email server password
17 fromName = "LabPipe Notification" # Sender name for notification email
18 fromAddress = "no-reply@labpipe.org" # Sender email for notification email
19
20 [labpipe.parameter]
21 manifest = []       # Currently not in use
22
23 [labpipe.security]
24 enforceSsl = true    # Forward all HTTP connection to HTTPS
25 rateLimitPublic = 100 # Rate limit for public APIs, per minute
26
27 [labpipe.storage]
28 cache = "/path/to/labpipe" # Cache directory
29 upload = "/path/to/labpipe/uploaded" # Directory for uploaded file
30 parts = "/path/to/labpipe/parts" # Directory for uploaded chunked file parts
31
```

Once you have modified the `config.toml` to your working database and email server, again run

```
java -jar labpipe-server-v{x.x.x}.jar check
```

If everything works fine, you should see something like

```
1  [main] INFO uk.ac.le.ember.labpipe.server.controllers.EmailController -
2      Email server connection successful.
3  [main] INFO uk.ac.le.ember.labpipe.server.controllers.DatabaseController -
4      Database connection successful.
```

Now you can initialise the database with:

```
java -jar labpipe-server-v{x.x.x}.jar init
```

This will populate the database with three collections:

| Collection       | Description                                                    |
|------------------|----------------------------------------------------------------|
| ROLES            | User or token roles for role-based access control              |
| API_ACCESS_ROLES | Role-based control and rate limit for specific APIs            |
| CLIENT_SETTINGS  | A manifest tells LabPipe Client which parameter(s) to retrieve |

Once `init` is completed, the contents for the three collections should look like

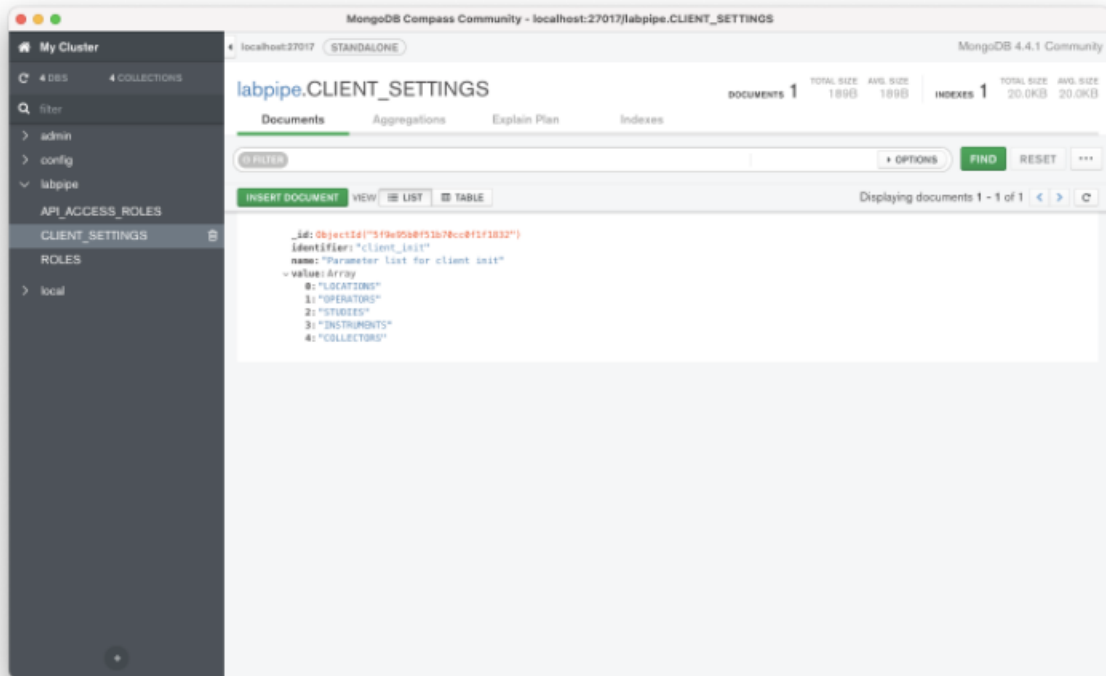

CLIENT\_SETTINGS collection viewed using MongoDB Compass

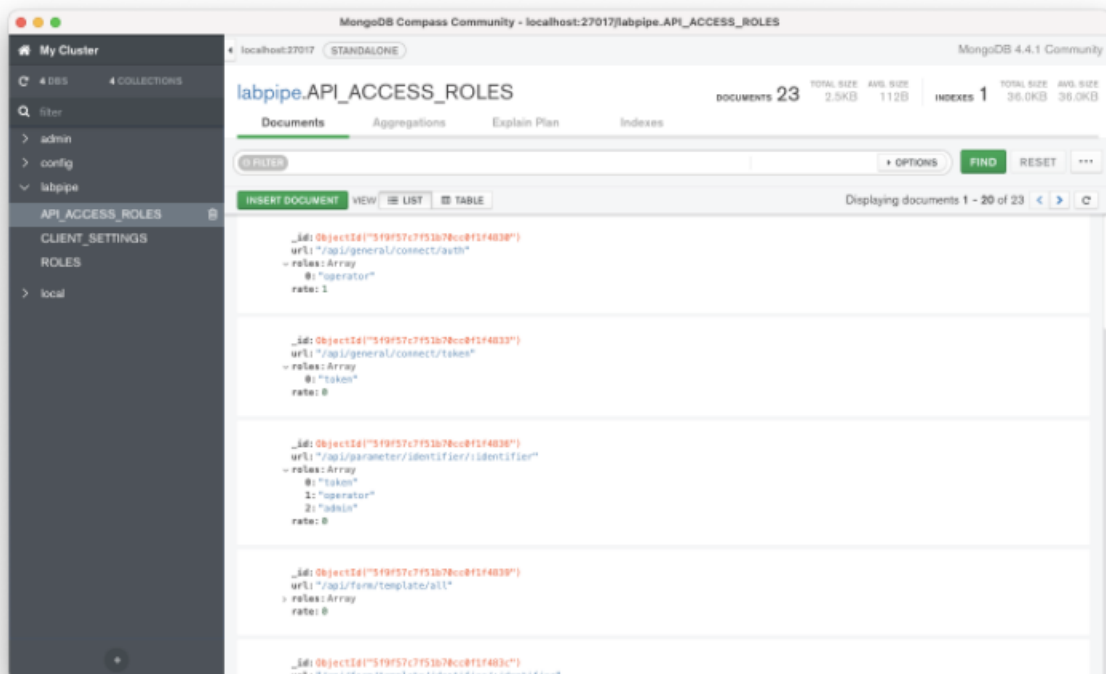

## API\_ACCESS\_ROLES collection viewed using MongoDB Compass

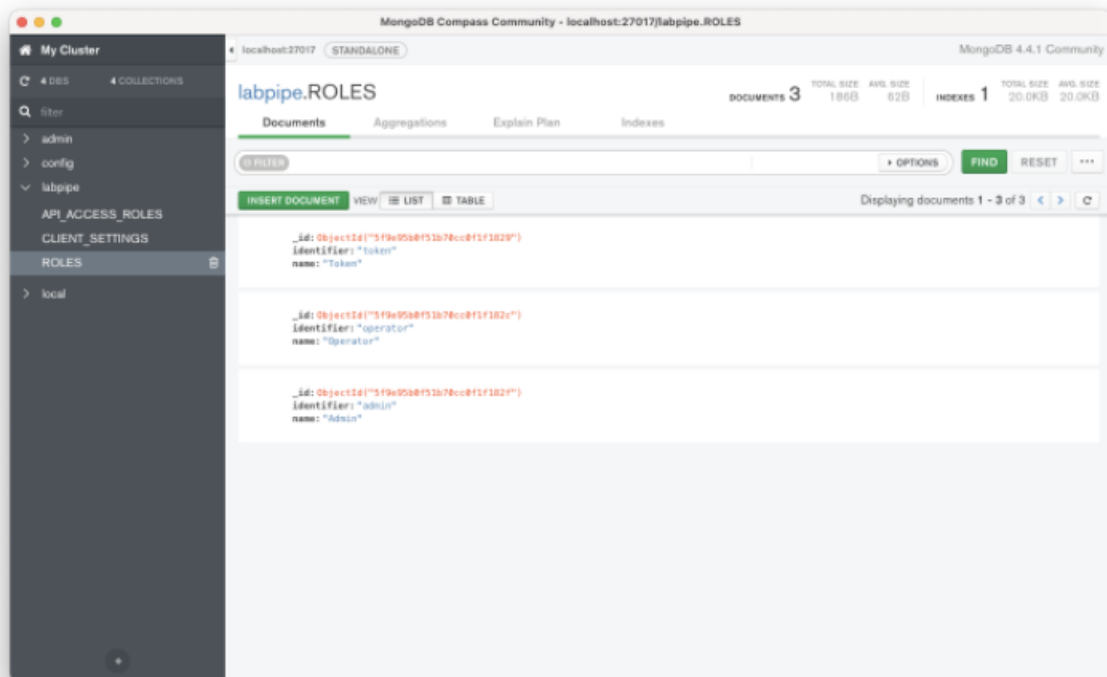

## API\_ACCESS\_ROLES collection viewed using MongoDB Compass

Now you can start the LabPipe Server using:

```
java -jar labpipe-server-v{x.x.x}.jar run
```

Then you should see something like:

```
1 [main] INFO io.javalin.Javalin - Starting Javalin ...
2 [main] INFO io.javalin.Javalin - Listening on http://localhost:4567/
3 [main] INFO io.javalin.Javalin - Javalin started in 115ms \o/
4 [main] INFO uk.ac.le.ember.labpipe.server.cmdline.CommandLineUtil - Server running
```

Now your LabPipe Server is up and running. However, for it to work properly with LabPipe Client, we need to have values for `Location`, `Instrument`, `Operator`, `Study`, `FormTemplate` and `AccessToken`.

First, let's add an `AccessToken` record and an `Operator` record

```
java -jar labpipe-server-v{x.x.x}.jar add operator --email test@labpipe.org --name LabPipe --show
```

```
java -jar labpipe-server-v{x.x.x}.jar add token
```

You will see output like

```
1 [main] INFO uk.ac.le.ember.labpipe.server.services.ManageService - [Token] 455afbc6
2 [main] INFO uk.ac.le.ember.labpipe.server.services.ManageService - [Key] u7qxmS6CI8
3 [main] INFO uk.ac.le.ember.labpipe.server.services.ManageService - [Username] test@
4 [main] INFO uk.ac.le.ember.labpipe.server.services.ManageService - [Password] jQbYL
```

Make a note of these credentials, as passwords and token keys are stored with encryption in the database. We will use these credentials later with LabPipe Client.

```
java -jar labpipe-server-v{x.x.x}.jar add location --identifier s1 --name Site1
java -jar labpipe-server-v{x.x.x}.jar add location --identifier s2 --name Site2
java -jar labpipe-server-v{x.x.x}.jar add instrument --identifier i1 --name Instrument1 --
file-type=csv
java -jar labpipe-server-v{x.x.x}.jar add instrument --identifier i2 --name Instrument2 --
file-type=lst
```

## Configure LabPipe Client

We assume this is the first time you have used LabPipe Client. When you start the software, you will be prompted for some mandatory settings:

LabPipe Client first use mandatory settings

LabPipe Client first use mandatory settings

You should notice that the red banner now says **Local mode**, which means the client is not connected to a LabPipe Server instance.

1. Select the directory to save metadata and data file locally
2. Enter LabPipe Server API root url ***http://localhost:4567***, then click ***VALIDATE***
3. Enter API token and key generated earlier, then click ***VALIDATE***  
Token: ***455afbc6-9d0b-4d68-a364-569ac456307f***  
Key: ***u7qxmS6CI8JvHkt2***
4. Click ***CONTINUE*** and restart the client

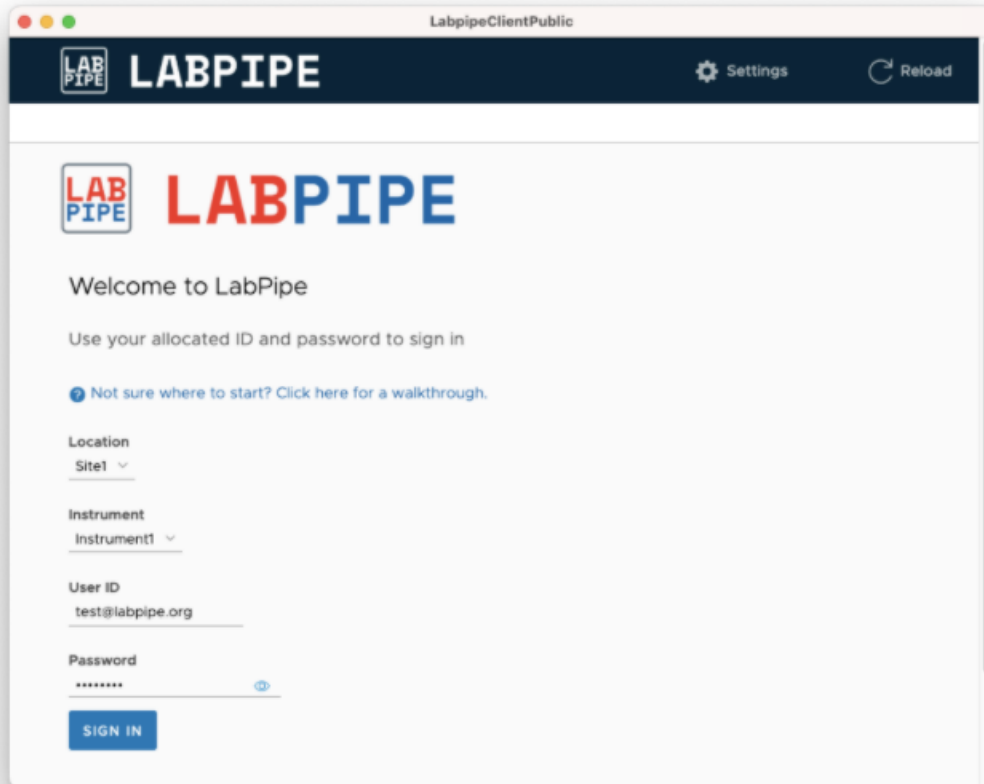

LabPipe login

Once restart completes, you can log in using the operator account added earlier. After logging in, you will notice that currently there is no study available to start. Now, let's add a study on the server.

---

## Set up study and data collection form

Download an example study configuration [labpipe\\_example\\_study\\_1.json](#), then run

```
java -jar labpipe-server-v{x.x.x}.jar --import study --source path/to/labpipe_example_study_1.json
```

Download an example form template [labpipe\\_example\\_form\\_1.json](#), then run

```
java -jar labpipe-server-v{x.x.x}.jar --import form --source path/to/labpipe_example_form_1.json
```

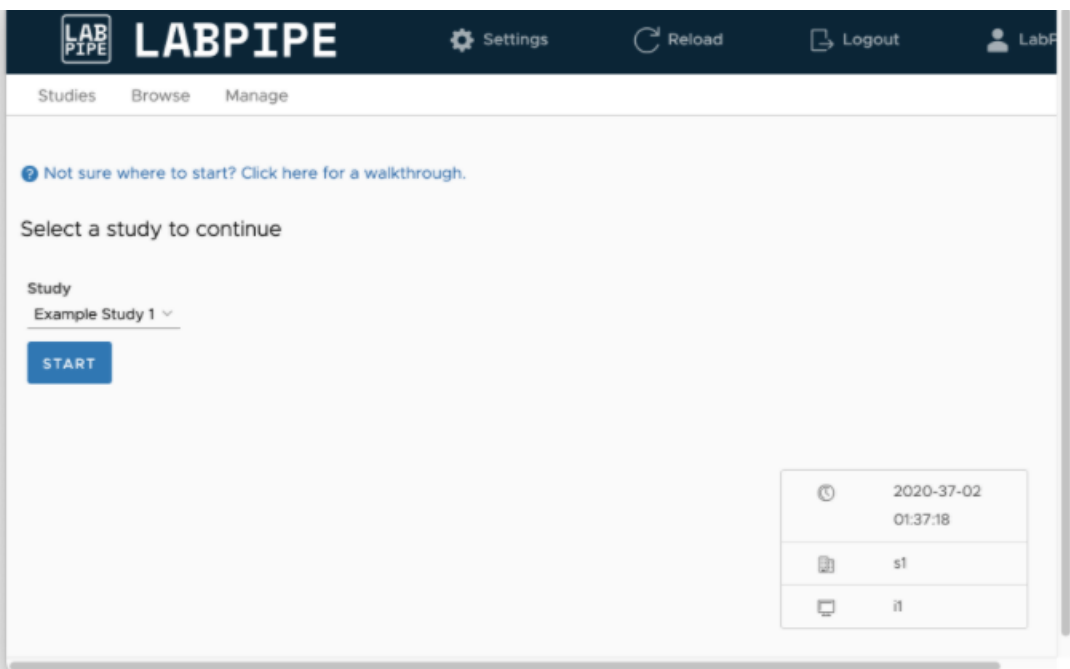

LabPipe Client select study

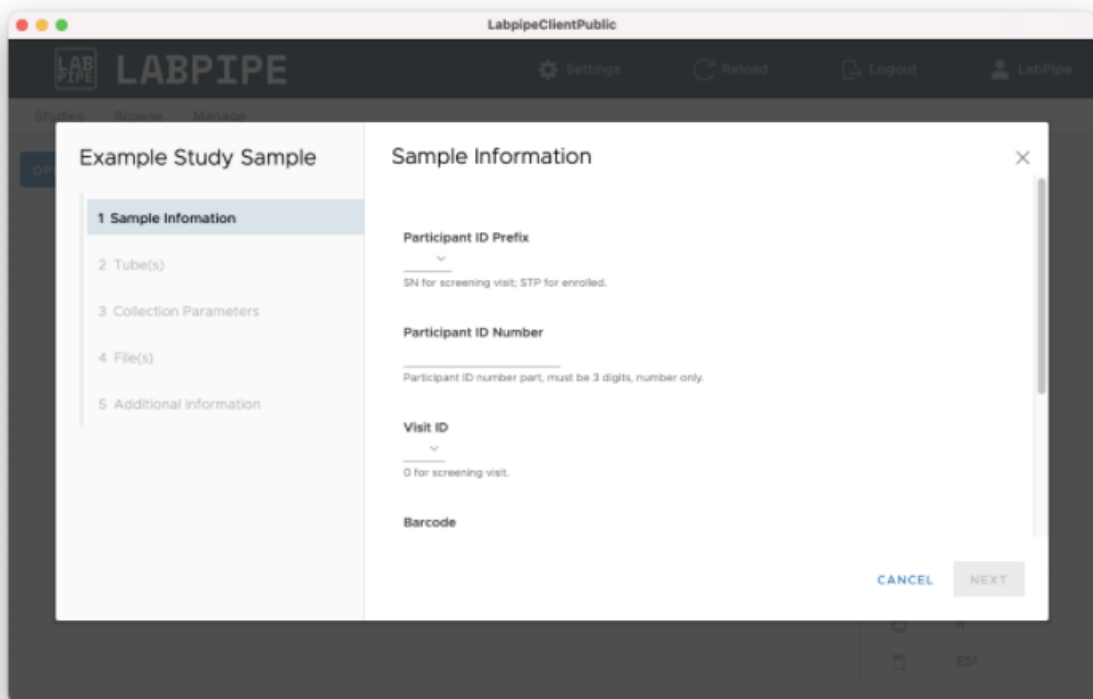

LabPipe Client data collection form

Now you can start collecting data using this example study sample form.

For additional documentation including example templates please go to [www.labpipe.org](http://www.labpipe.org)
